RESEARCH ARTICLE

# Dosimetric divergence in ICBT vs. IC/ISBT configurations: Comparative analysis of three optimization algorithms for cervical cancer brachytherapy

Jihong Chen<sup>1</sup>✉, Jiabiao Hong<sup>1</sup>✉, Kaiqiang Chen<sup>1</sup>, Xiuchun Zhang<sup>1</sup>, Guohua Wang<sup>2</sup>, Penggang Bai<sup>1\*</sup>

**1** Department of Radiation Oncology, Clinical Oncology School of Fujian Medical University, Fujian Cancer Hospital, Fuzhou, Fujian, China, **2** School of Nuclear Science and Technology, University of South China, Hengyang, China

✉ These authors contributed equally to this work.

\* [littwind@sina.cn](mailto:littwind@sina.cn)

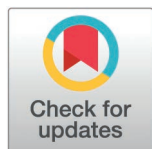

## OPEN ACCESS

**Citation:** Chen J, Hong J, Chen K, Zhang X, Wang G, Bai P (2025) Dosimetric divergence in ICBT vs. IC/ISBT configurations: Comparative analysis of three optimization algorithms for cervical cancer brachytherapy. PLoS One 20(11): e0335405. <https://doi.org/10.1371/journal.pone.0335405>

**Editor:** Satyajeet Rath, All India Institute of Medical Sciences, INDIA

**Received:** July 18, 2025

**Accepted:** October 11, 2025

**Published:** November 13, 2025

**Copyright:** © 2025 Chen et al. This is an open access article distributed under the terms of the [Creative Commons Attribution License](https://creativecommons.org/licenses/by/4.0/), which permits unrestricted use, distribution, and reproduction in any medium, provided the original author and source are credited.

**Data availability statement:** All relevant data in this study have been deposited in Figshare and are available via the DOI: <https://figshare.com/s/9e616d4da88c0e967272>.

**Funding:** The project was sponsored by Joint Funds for the innovation of science and

## Abstract

### Objective

To compare dosimetric differences among graphical-based manual planning (MA), simulated annealing inverse optimization (IPSA), and hybrid inverse optimization (HIPO) for cervical cancer in both intra-cavitary brachytherapy (ICBT) and interstitial brachytherapy combined with ICBT (IC/ISBT) settings, providing evidence for clinical optimization method selection.

### Methods

This study consisted of 60 cervical cancer patients undergoing CT-guided three-dimensional brachytherapy, including 30 ICBT patients and 30 IC/ISBT patients. Plans were generated using MA, IPSA, and HIPO. The dosimetric parameters for the high-risk clinical target volume (HRCTV) including  $D_{100\%}$ ,  $V_{150\%}$ ,  $V_{200\%}$ , conformity index (CI), homogeneity index (HI) were compared. Meanwhile, the dosimetric parameters  $D_{1cc}$ ,  $D_{2cc}$  for the bladder, rectum, sigmoid, and total treatment time were evaluated.

### Results

Compared with MA, both IPSA and HIPO delivered lower doses to organs at risk (OARs). The total treatment time was significantly shorter for HIPO compared to IPSA and MA ( $P < 0.05$ ). In ICBT patients, the  $D_{1cc}$  and  $D_{2cc}$  of OARs were lower for IPSA compared to HIPO ( $P > 0.05$ ), while the CI was significantly better for HIPO ( $P < 0.05$ ). Nevertheless, in IC/ISBT patients,  $D_{2cc}$  of rectum for HIPO was significantly lower compared to IPSA ( $P < 0.05$ ), with better CI.

Technology, Fujian province (Grant number: 2021Y9190 to JC), Science and Technology Project of Fujian Province (Grant number: 2021Y0052 to JC, 2022Y0056 to PB), Startup Fund for scientific research, Fujian Medical University (Grant number: 2024QH1173 to JH), and Fujian Provincial Clinical Research Center for Cancer Radiotherapy and Immunotherapy (Grant number: 2020Y2012 to JC). The funders had no role in study design, data collection and analysis, decision to publish, or preparation of the manuscript.

**Competing interests:** The authors have declared that no competing interests exist.

## Conclusion

Inverse optimization effectively reduces doses to OARs while maintaining target coverage. HIPO appears to be the preferred choice for IC/ISBT, due to shortened treatment time, superior CI and rectal protection compared with IPSA.

## 1 Introduction

Cervical cancer is a common gynecological malignancy significantly threatening women's health globally [1]. Brachytherapy (BT), which delivers radiation directly into or near tumors, is crucial in cervical cancer treatment [2,3]. Intra-cavitary brachytherapy (ICBT), using applicators inserted through natural body cavities to deliver radiation, is a relatively simple and minimally invasive technique and constitutes the standard approach for BT [4]. However, when tumor volume is large, regression is inadequate, or vaginal stenosis occurs, ICBT alone may yield suboptimal target coverage. In such cases, interstitial brachytherapy (ISBT) combined with ICBT (IC/ISBT) is employed to enhance target coverage [5,6].

Traditional forward planning depends on physicists manually adjusting dwell positions and times for target coverage and organs at risk (OARs) protection. Graphical optimization (Gro), a typical forward optimization method, manually adjusts isodose lines to cover targets and spare adjacent normal tissues. Over the past two decades, inverse planning has gained popularity due to shorter planning times, better repeatability, higher efficiency, potentially superior target coverage, and reduced OARs dose [7–17]. Inverse Planning Simulated Annealing (IPSA) [18], which optimizes dwell times based on anatomical structures and defined constraints, is widely used due to its efficacy and popularity. Christopher et al. found that high-dose-rate (HDR) BT planned using IPSA was well tolerated and provided excellent local control [19]. More recently, Hybrid Inverse Planning Optimization (HIPO), which combines simulated annealing and limited-memory deterministic algorithms (L-BFGS), offers three-dimensional dose distribution and allows for manual source channel locking, representing an advanced volumetric optimization tool [20]. Petra et al. demonstrated that HIPO can generate clinically acceptable treatment plans and eliminate high-dose regions in normal tissue [21].

Studies have found that HIPO provides prostate BT plans clinically comparable to IPSA, with enhanced conformity, potentially more homogeneous dwell times, and reduced hotspots [22]. Similarly, IPSA and HIPO have been shown to achieve similar dosimetry for interstitial tongue HDR BT [23]. However, comparative studies of HIPO and IPSA for cervical cancer BT, especially involving different applicators, remain limited [24,25]. These related articles typically compare IPSA and HIPO primarily in single scenarios such as IC/ISBT or ICBT, without directly comparing them with the most commonly used graphical optimization algorithms in clinical practice. In contrast, this study compares dosimetric outcomes and dwell time distribution characteristics among Manual (MA), IPSA, and HIPO-generated BT plans for both IC/ISBT and ICBT scenarios, within the same institution under consistent data conditions and offering more practical clinical references.

## 2 Materials and methods

### 2.1 Clinical data

This study was approved by the Ethics Committee of Fujian Provincial Cancer Hospital (K2022-184–01), and patient informed consent was waived. All studies adhered to the Declaration of Helsinki. Sixty cervical cancer patients receiving three-dimensional BT between December 2024 and April 2025 at Fujian Provincial Cancer Hospital were retrospectively enrolled, with 30 patients each in the ICBT and IC/ISBT groups. Collected images were fully anonymized, preventing author access to personally identifiable information. Patient ages ranged from 38 to 82 years, with a mean age of 65 years and a median of 67 years. All patients had histologically confirmed diagnoses, complete medical records, and good tolerance for radiotherapy. The initial BT treatment plan for each patient was included in the analysis.

### 2.2 Applicator implantation and CT scanning

Patients were placed in the lithotomy positions. Oral contrast medium (iopamidol) was administered to delineate the small intestine, and 100 ml of saline solution was infused into the bladder before each CT scan. Nucletron standard tandem and ovoid applicators were used in the ICBT group, and tandem applicators combined with four interstitial needles were employed in the IC/ISBT group. CT images were acquired using a Philips Brilliance CT Big Bore scanner (Philips Medical Systems Inc., Cleveland, OH, USA) with a 512 × 512-pixel matrix and 2.5 mm slice thickness.

### 2.3 Planning design

CT images were transferred to the Oncentra Brachy planning system (version 4.6.3, Elekta, Stockholm, Sweden). Physicians delineated HRCTV and OARs following GEC-ESTRO guidelines, including the lower uterus, cervix, parametrium, and upper vagina. OARs included bladder, rectum, and sigmoid. After reconstructing applicator channels on original CT images, three plans were created for each patient using the three optimization methods. Continuous plan adjustments ensured the dose corresponding to 90% ( $D_{90}$ ) of HRCTV volume reached 6 Gy (within 0.01 Gy) while minimizing radiation dose to OARs. The source activity was set to 8 Ci.

The MA group used manual dwell position selection and graphical optimization to adjust isodose lines.

IPSA plans automatically defined dwell positions, setting constraints for minimal target surface dose and maximal OAR surface dose (Table 1). For IPSA, a dwell time deviation constraint (DTDC) [26] of 0.5 was used to prevent isolated dwell positions with excessively long times.

HIPO plans added maximum dose constraints to HRCTV (Table 1). For HIPO, a dwell time gradient restriction (DTGR) [27] of 0.5 was applied to limit fluctuations between neighboring dwell times, consistent with prior studies. In order to reduce the planning time, both IPSA and HIPO plans were manually fine-tuned post-optimization when  $D_{90}$  of HRCTV was very close to 6Gy (within 0.05 Gy).

**Table 1. Dose volume optimization parameters for IPSA and HIPO plan.**

|      | OAR (surface) | Weight | Min (Gy) | Max (Gy) | Weight |
|------|---------------|--------|----------|----------|--------|
| IPSA | HRCTV         | 100    | 6        |          |        |
|      | Bladder       |        |          | 3.5      | 90     |
|      | Rectum        |        |          | 3        | 80     |
|      | Sigmoid       |        |          | 3        | 80     |
| HIPO | HRCTV         | 100    | 6        | 14       | 1      |
|      | Bladder       |        |          | 3.5      | 90     |
|      | Rectum        |        |          | 3        | 80     |
|      | Sigmoid       |        |          | 3        | 80     |
|      | Normal tissue |        |          | 6        | 50     |

<https://doi.org/10.1371/journal.pone.0335405.t001>

## 2.4 Dosimetric evaluation

Planning time and treatment times were recorded, and several dosimetric parameters were analyzed using dose-volume histograms (DVHs). HRCTV dose corresponding to 100% of volume ( $D_{100}$ ), the volume percentage of 100%, 150% and 200% of the prescription dose ( $V_{100\%}$ ,  $V_{150\%}$ ,  $V_{200\%}$ ), conformity index ( $CI = (V_{\text{prescription in HRCTV}} / V_{\text{HRCTV}}) * (V_{\text{prescription in HRCTV}} / V_{\text{prescription}})$ ) and homogeneity index ( $HI = (V_{100\%} - V_{150\%}) / V_{100\%}$ ) were all evaluated. Meanwhile, Dose corresponding to 1cc volume ( $D_{1cc}$ ) and 2cc volume ( $D_{2cc}$ ) of bladder, rectum and sigmoid were calculated.

## 2.5 Statistical analysis

Paired t-tests (for normally distributed data) or Wilcoxon signed-rank tests (for non-normally distributed data) were carried out for dosimetric parameters previously described. Statistical package for the Social Sciences (SPSS 21.0; SPSS Inc., Chicago, IL, USA) was used to perform these tests and  $p < 0.05$  was considered statistically significant. (Dosimetric comparison with the Benjamini-Hochberg false discovery rate correction of MA, IPSA and HIPO plans in the ICBT cohort and the IC/ISBT cohort were listed separately in [S1](#) and [S2 Tables](#).)

## 3 Results

The HRCTV volume among the 60 patients ranged from 17.7 to 86.7 cm<sup>3</sup> (median 42.6 cm<sup>3</sup>). Median volumes were 40.1 cm<sup>3</sup> in the ICBT cohort and 43.4 cm<sup>3</sup> in the IC/ISBT cohort.

### 3.1 ICBT cohort

[Fig 1](#) shows the dose distribution of MA, IPSA and HIPO for the same patient in the ICBT cohort. The high-dose region (9 Gy and 12 Gy) of IPSA was smaller than that of MA and HIPO.

IPSA plans yielded significantly lower  $V_{150\%}$  and  $V_{200\%}$  values and a higher HI than MA plans ( $p < 0.05$ ), as shown in [Table 2](#) and [Fig 2](#). HIPO produced the best CI, superior to both MA and IPSA plans ( $p < 0.05$ ). For OARs, the doses in IPSA and HIPO plans were consistently below those of MA plans; differences were significant except for rectum  $D_{1cc}$  and  $D_{2cc}$  in HIPO ( $p > 0.05$ ). Meanwhile, the OAR doses for IPSA and HIPO were comparable and showed no statistically significant difference.

### 3.2 IC/ISBT cohort

[Fig 3](#) shows the dose distribution of MA, IPSA and HIPO for the same patient in the IC/ISBT cohort. The high-dose region (9 Gy and 12 Gy) of MA was larger than that of IPSA and HIPO, especially in the tandem region.

Both IPSA and HIPO plans showed significantly lower  $V_{150\%}$  and  $V_{200\%}$  and higher HI and CI than MA plans (all  $p < 0.001$ ), as shown in [Table 3](#) and [Fig 4](#). HIPO achieved the highest CI, outperforming IPSA ( $p < 0.001$ ). OAR doses in IPSA and HIPO were below MA values. Rectum  $D_{1cc}$  in IPSA did not differ from MA, whereas HIPO yielded significantly lower rectum  $D_{1cc}$  and  $D_{2cc}$  than IPSA.

### 3.3 Plan characteristics

HIPO markedly shortened total dwell time compared with MA and IPSA plans in both cohorts ( $p < 0.05$ ), shown in [Table 4](#). IPSA devoted the smallest proportion of dwell time to the tandem, followed by HIPO. The mean optimization time for IPSA was the shortest, followed by HIPO and MA.

## 4 Discussion

Three-dimensional BT planning can use forward methods (e.g., Gro) or inverse algorithms (e.g., IPSA, HIPO). Forward planning is labour-intensive, highly operator-dependent, and sometimes fails to achieve an acceptable dose distribution in



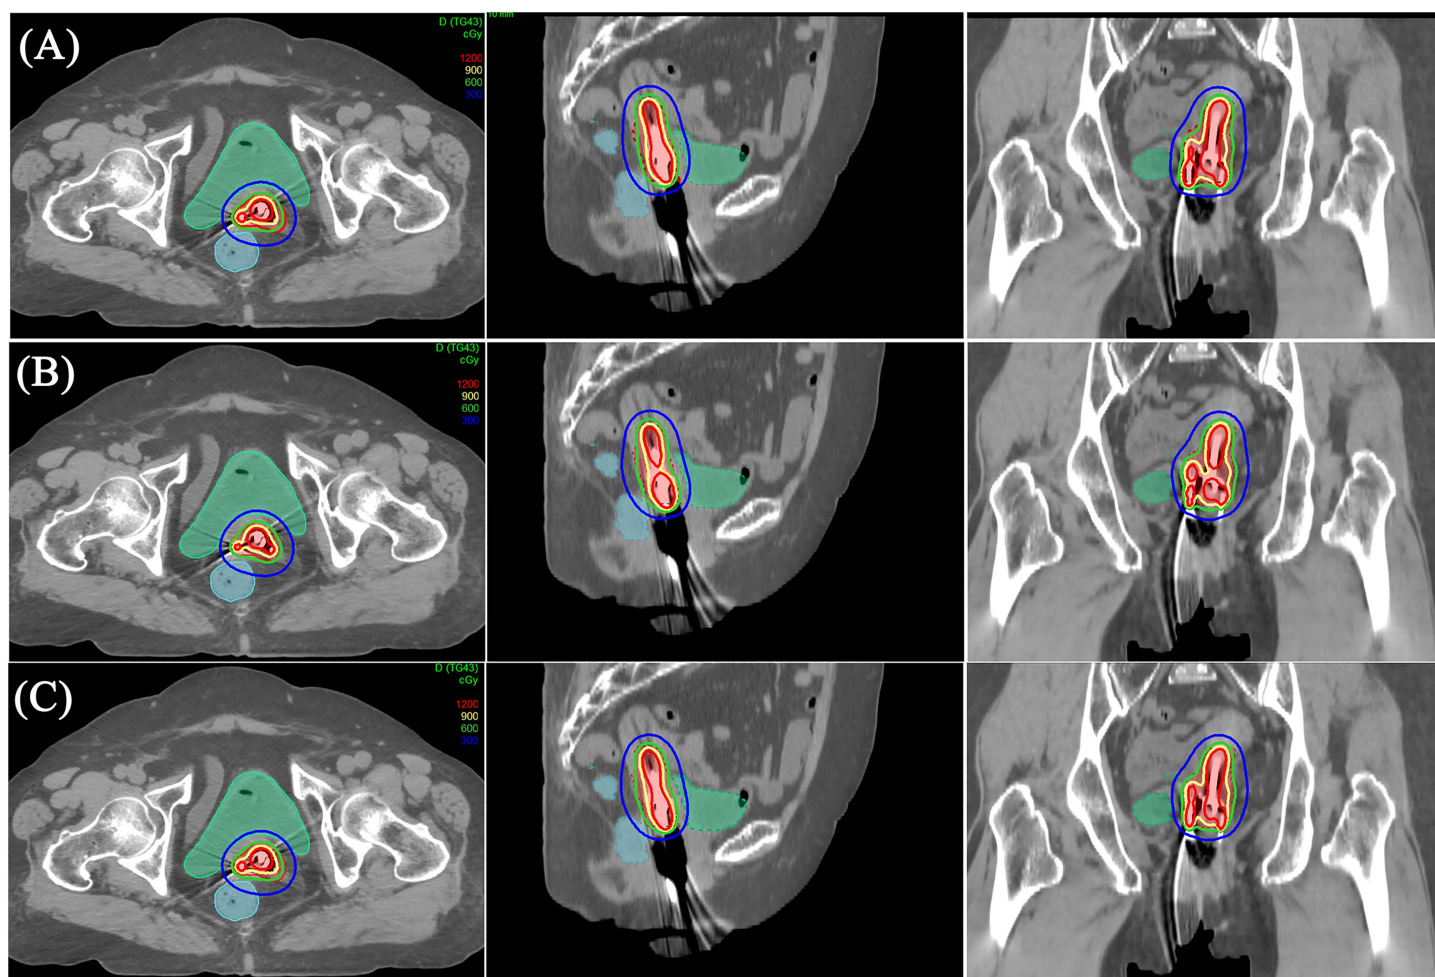

**Fig 1. Dose distribution for each plan for a patient in ICBT cohort. (A): MA. (B): IPSA. (C): HIPO.**

<https://doi.org/10.1371/journal.pone.0335405.g001>

**Table 2. Dosimetric comparison of Manual, IPSA and HIPO plans in the ICBT cohort (mean  $\pm$  SD).**

|         | Parameter             | MA               | IPSA             | HIPO             | P1     | P2     | P3     |
|---------|-----------------------|------------------|------------------|------------------|--------|--------|--------|
| HRCTV   | D <sub>100</sub> (Gy) | 3.55 $\pm$ 0.40  | 3.61 $\pm$ 0.45  | 3.52 $\pm$ 0.42  | 0.418  | 0.682  | 0.278  |
|         | V <sub>150%</sub> (%) | 53.07 $\pm$ 3.70 | 51.66 $\pm$ 2.45 | 52.03 $\pm$ 3.68 | 0.030* | 0.091  | 0.523  |
|         | V <sub>200%</sub> (%) | 31.19 $\pm$ 3.33 | 29.82 $\pm$ 2.28 | 30.49 $\pm$ 3.38 | 0.010* | 0.145  | 0.156  |
|         | HI                    | 0.41 $\pm$ 0.04  | 0.43 $\pm$ 0.03  | 0.42 $\pm$ 0.04  | 0.030* | 0.095  | 0.505  |
|         | CI                    | 0.66 $\pm$ 0.08  | 0.67 $\pm$ 0.06  | 0.71 $\pm$ 0.08  | 0.558  | 0.000* | 0.000* |
| Bladder | D <sub>1cc</sub> (Gy) | 4.25 $\pm$ 0.44  | 4.10 $\pm$ 0.39  | 4.15 $\pm$ 0.39  | 0.006* | 0.021* | 0.214  |
|         | D <sub>2cc</sub> (Gy) | 3.94 $\pm$ 0.40  | 3.83 $\pm$ 0.38  | 3.84 $\pm$ 0.37  | 0.017* | 0.010* | 0.646  |
| Rectum  | D <sub>1cc</sub> (Gy) | 3.37 $\pm$ 0.72  | 3.25 $\pm$ 0.69  | 3.29 $\pm$ 0.72  | 0.010* | 0.102  | 0.299  |
|         | D <sub>2cc</sub> (Gy) | 3.00 $\pm$ 0.66  | 2.91 $\pm$ 0.64  | 2.93 $\pm$ 0.66  | 0.019* | 0.077  | 0.546  |
| Sigmoid | D <sub>1cc</sub> (Gy) | 2.78 $\pm$ 0.98  | 2.67 $\pm$ 0.87  | 2.71 $\pm$ 0.97  | 0.007* | 0.045  | 0.298  |
|         | D <sub>2cc</sub> (Gy) | 2.48 $\pm$ 0.86  | 2.39 $\pm$ 0.79  | 2.41 $\pm$ 0.85  | 0.009* | 0.026* | 0.450  |

P1 represents p-value of IPSA vs. MA; P2 represents p-value of HIPO vs. MA; P3 represents p-value of IPSA vs. HIPO. All p-values derived from paired t-tests.

\*: p-value < 0.05.

<https://doi.org/10.1371/journal.pone.0335405.t002>

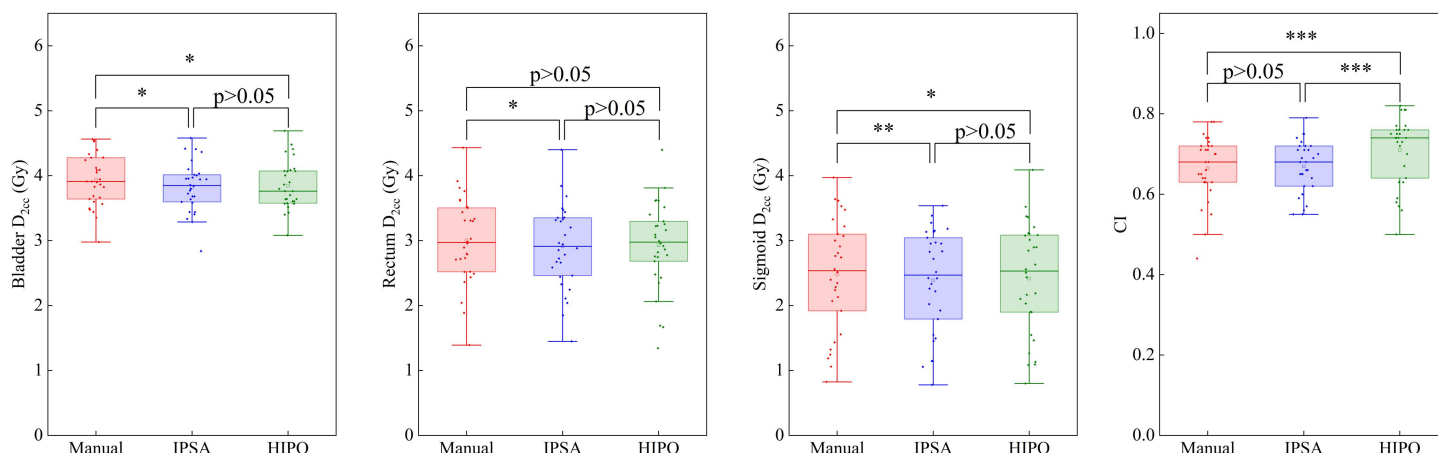

**Fig 2. Box plots of the main dosimetric parameters ( $D_{2cc}$  for bladder, rectum and sigmoid, CI) for the MA, IPSA and HIPO plans in the ICBT cohort. \*: p-value between 0.01 and 0.05. \*\*: p-value between 0.001 and 0.01. \*\*\*: p-values<0.001.**

<https://doi.org/10.1371/journal.pone.0335405.g002>

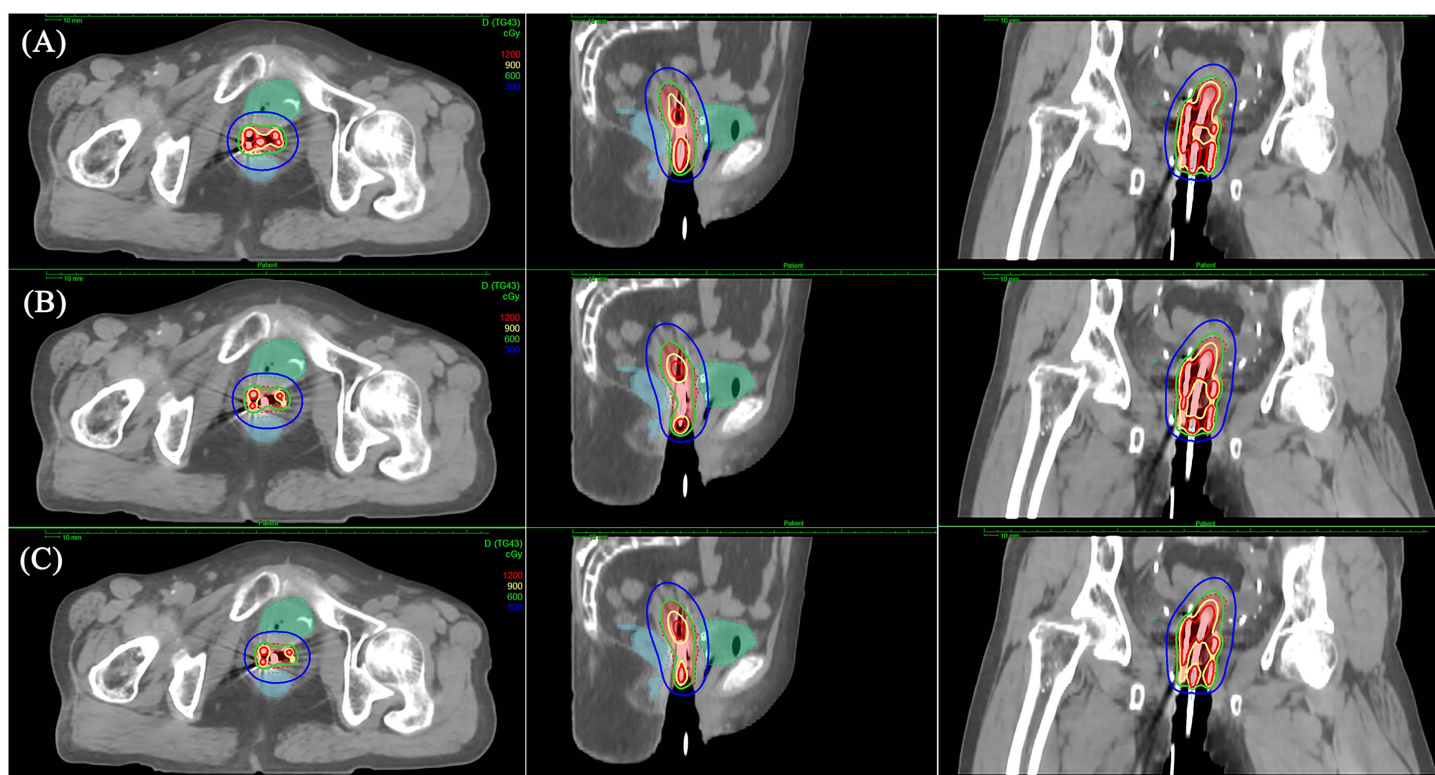

**Fig 3. Dose distribution for each plan for a patient in IC/ISBT cohort. (A): MA. (B): IPSA. (C): HIPO.**

<https://doi.org/10.1371/journal.pone.0335405.g003>

complex cases. Inverse planning leverages computational optimization to satisfy target and OAR objectives more efficiently. In this study, we simultaneously explored the dosimetric differences resulting from three planning methods under both IC/ISBT and ICBT scenarios. Our results indicate that under ICBT, the differences in organ doses among the three

**Table 3. Dosimetric comparison of Manual, IPSA and HIPO plans in the IC/ISBT cohort (mean  $\pm$  SD).**

|         | Parameter             | MA               | IPSA             | HIPO             | P1     | P2     | P3     |
|---------|-----------------------|------------------|------------------|------------------|--------|--------|--------|
| HRCTV   | D <sub>100</sub> (Gy) | 3.46 $\pm$ 0.31  | 3.53 $\pm$ 0.34  | 3.56 $\pm$ 0.28  | 0.224  | 0.094  | 0.595  |
|         | V <sub>150%</sub> (%) | 52.22 $\pm$ 4.66 | 47.84 $\pm$ 5.47 | 47.4 $\pm$ 6.14  | 0.000* | 0.000* | 0.299  |
|         | V <sub>200%</sub> (%) | 27.93 $\pm$ 5.47 | 25.66 $\pm$ 4.93 | 25.06 $\pm$ 5.49 | 0.000* | 0.000* | 0.083  |
|         | HI                    | 0.42 $\pm$ 0.05  | 0.47 $\pm$ 0.06  | 0.47 $\pm$ 0.07  | 0.000* | 0.000* | 0.300  |
|         | CI                    | 0.71 $\pm$ 0.05  | 0.72 $\pm$ 0.06  | 0.77 $\pm$ 0.06  | 0.443  | 0.000* | 0.000* |
| Bladder | D <sub>1cc</sub> (Gy) | 4.28 $\pm$ 0.64  | 4.05 $\pm$ 0.55  | 4.09 $\pm$ 0.55  | 0.000* | 0.000* | 0.074  |
|         | D <sub>2cc</sub> (Gy) | 3.96 $\pm$ 0.57  | 3.80 $\pm$ 0.52  | 3.81 $\pm$ 0.52  | 0.000* | 0.000* | 0.613  |
| Rectum  | D <sub>1cc</sub> (Gy) | 3.99 $\pm$ 0.72  | 3.80 $\pm$ 0.65  | 3.75 $\pm$ 0.69  | 0.647  | 0.000* | 0.000* |
|         | D <sub>2cc</sub> (Gy) | 3.58 $\pm$ 0.62  | 3.45 $\pm$ 0.56  | 3.37 $\pm$ 0.59  | 0.022* | 0.000* | 0.000* |
| Sigmoid | D <sub>1cc</sub> (Gy) | 2.86 $\pm$ 0.86  | 2.76 $\pm$ 0.87  | 2.73 $\pm$ 0.87  | 0.034* | 0.001* | 0.348  |
|         | D <sub>2cc</sub> (Gy) | 2.55 $\pm$ 0.79  | 2.47 $\pm$ 0.79  | 2.44 $\pm$ 0.78  | 0.047* | 0.001* | 0.261  |

P1 represents p-value of IPSA vs. MA; P2 represents p-value of HIPO vs. MA; P3 represents p-value of IPSA vs. HIPO. All p-values derived from paired t-tests.

\*: p-values  $\leq$  0.05.

<https://doi.org/10.1371/journal.pone.0335405.t003>

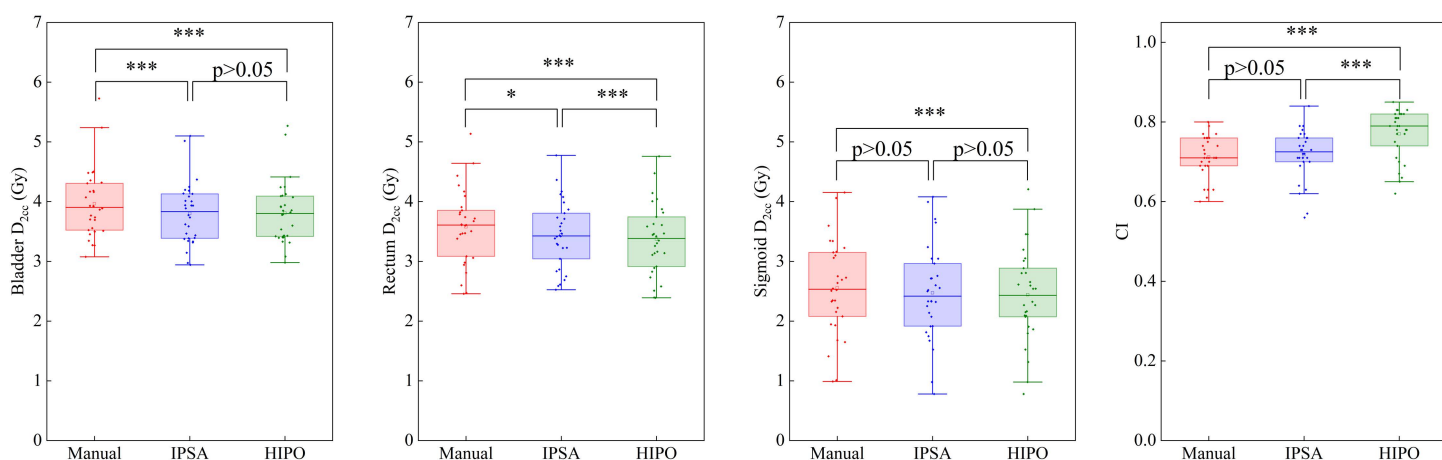

**Fig 4. Box plots of the main dosimetric parameters (CI, D<sub>2cc</sub> for bladder, rectum and sigmoid) for the MA, IPSA and HIPO plans in the IC/ISBT cohort. \*: p-value between 0.01 and 0.05. \*\*: p-value between 0.001 and 0.01. \*\*\*: p-values  $\leq$  0.001.**

<https://doi.org/10.1371/journal.pone.0335405.g004>

**Table 4. Dwell-time metrics and optimization time for MA, IPSA and HIPO plans (mean  $\pm$  SD).**

|         | Parameter              | MA                  | IPSA                | HIPO                | P1    | P2    | P3    |
|---------|------------------------|---------------------|---------------------|---------------------|-------|-------|-------|
| ICBT    | Total loading time (s) | 325.34 $\pm$ 182.27 | 324.92 $\pm$ 183.99 | 307.93 $\pm$ 177.84 | 0.704 | 0.000 | 0.000 |
|         | T <sub>tan/tot</sub>   | 0.56 $\pm$ 0.15     | 0.50 $\pm$ 0.15     | 0.53 $\pm$ 0.15     | 0.005 | 0.069 | 0.136 |
|         | Optimization time (s)  | 122.57 $\pm$ 19.02  | 16.47 $\pm$ 4.02    | 19.26 $\pm$ 3.82    | 0.000 | 0.000 | 0.006 |
| IC/ISBT | Total loading time (s) | 271.63 $\pm$ 66.24  | 270.15 $\pm$ 56.53  | 256.27 $\pm$ 56.29  | 0.517 | 0.000 | 0.000 |
|         | T <sub>tan/tot</sub>   | 0.48 $\pm$ 0.16     | 0.44 $\pm$ 0.16     | 0.46 $\pm$ 0.14     | 0.000 | 0.000 | 0.275 |
|         | Optimization time (s)  | 128.90 $\pm$ 17.69  | 16.06 $\pm$ 2.91    | 19.36 $\pm$ 5.01    | 0.000 | 0.000 | 0.003 |

P1 represents p-value of IPSA vs. MA; P2 represents p-value of HIPO vs. MA; P3 represents p-value of IPSA vs. HIPO. All p-values derived from Wilcoxon signed-rank test. T<sub>tan/tot</sub> represents the ratio of tandem loading time in the total loading time.

<https://doi.org/10.1371/journal.pone.0335405.t004>

plans are relatively small. In contrast, under IC/ISBT, HIPO demonstrates lower rectal doses, which may reduce the probability of rectal toxicities. Additionally, HIPO achieves the shortest treatment time across all scenarios. Although its planning time is slightly longer than that of IPSA, the overall time remains the lowest, which could improve the daily workflow efficiency and reduce patient discomfort.

In the present study, all three approaches met prescription requirements. For ICBT, with fewer applicator channels, the high-dose volumes and homogeneity achieved by IPSA and HIPO were largely comparable with MA, though MA relied more heavily on tandem dwell times, producing larger high-dose regions that remain clinically tolerable and desirable. The organ doses for IPSA and HIPO are generally comparable and are significantly lower than those of MA, consistent with previous findings [28,29]. When applicator geometry became more complex in IC/ISBT, HIPO demonstrated certain advantages. It significantly decreased rectal dose and improved CI compared with IPSA while maintaining similar doses to other OARs. In this study, the coverage of HRCTV for all plans were set to 90%. Moreover, there is no clear clinical evidence demonstrating that plans with better HI are associated with superior clinical outcomes [30]. Therefore, it can be concluded that the tumor control probability (TCP) is comparable among the three plans. A larger CI implies a smaller volume of prescription dose delivered to normal tissues. A radiobiological study about cervical cancer BT reported that an increase of 0.11 Gy in rectum  $D_{2cc}$  (from 4.26 Gy to 4.37 Gy) raised the normal tissue complication probability (NTCP) of rectum from 1.62% to 2.15%. Similarly, an increase of 0.18 Gy in bladder  $D_{2cc}$  (from 4.59 Gy to 4.77 Gy) increased the NTCP of bladder from 0.23% to 0.24% [31]. The difference in  $D_{2cc}$  for OARs between inverse planning and MA were approximately on the order of 0.10–0.2 Gy in our study, which could affect the NCTP. Additionally, another multicenter prospective cohort study indicated that a rectum  $D_{2cc} < 65$  Gy, summed BT doses with external beam radiotherapy doses and converted to 2Gy per fraction equivalent dose (EQD2), was associated with a two times lower risk of proctitis than  $D_{2cc} \geq 65$  Gy [32]. In the context of IC/ISBT, the difference in rectum EQD2 ( $\alpha/\beta = 3$  Gy, in 5 fractions) between HIPO and MA reached 2.1 Gy (23.6Gy vs. 21.5Gy), which is approximately 3% of the threshold dose and quite considerable.

The most significant difference between HIPO and IPSA optimization lies in the distribution of source residence time. Spatial dwell-position distribution was more continuous and even with HIPO, whereas IPSA exhibited larger dwell-time fluctuations [33]. When the residence time at a certain spatial position within the channel varies greatly, it may lead to local dose hotspots or insufficient doses in the target area, and even cause dose limits to be exceeded for OARs. HIPO also shortened total irradiation time by roughly 5% for both cohorts, a benefit that may enhance applicator stability between fractions and reduce patient discomfort. Therefore, in the planning design of cervical cancer IC/ISBT, the HIPO optimization algorithm can serve as an effective alternative to IPSA.<sup>31</sup> In a study by Pooriawat et al., it was found that time delays during both treatment planning and delivery can impact OAR doses, as additional time may lead to increased urine accumulation in the bladder [34]. Therefore, it is crucial to minimize the overall procedural duration. In this study, when considering both planning and delivery times, HIPO required significantly less time compared to IPSA and MA. Moreover, it is worth noting that as source activity decreases, the difference in overall time becomes more pronounced. This advantage may contribute to enhancing the BT workflow efficiency.

Of course, this study also has some limitations. First, this study is solely a retrospective dosimetric comparison and lacks relevant clinical data. Second, constrained by the number of cases, the study only considered the most common four-needle configuration at our center. Therefore, the applicability of the findings from this study to cases with different numbers of interstitial needles remains to be validated. Third, to facilitate comparison, the DTGR constraint for HIPO and the DTDC for IPSA were both set to a fixed value of 0.5. The selection of this parameter could influence the final result of the inverse optimization and warrants further investigation in subsequent studies [35].

## 5 Conclusion

Both IPSA and HIPO inverse-planning algorithms achieve prescription coverage while lowering OAR doses compared with MA. In more complex IC/ISBT setting, HIPO should be the first-line strategy, due to further lower rectal dose and shorter treatment time.



## Supporting information

**S1 Table. Dosimetric comparison with the Benjamini-Hochberg false discovery rate correction of MA, IPSA and HIPO plans in the ICBT cohort (mean  $\pm$  SD).** P1 represents p-value of IPSA vs. MA; P2 represents p-value of HIPO vs. MA; P3 represents p-value of IPSA vs. HIPO. \*: p-value  $\leq 0.05$ . All p-values were derived from paired t-tests and adjusted for multiple comparisons using the Benjamini-Hochberg (FDR) correction. (DOCX)

**S2 Table. Dosimetric comparison with the Benjamini-Hochberg false discovery rate correction of MA, IPSA and HIPO plans in the IC/ISBT cohort (mean  $\pm$  SD).** P1 represents p-value of IPSA vs. MA; P2 represents p-value of HIPO vs. MA; P3 represents p-value of IPSA vs. HIPO. \*: p-value  $\leq 0.05$ . All p-values were derived from paired t-tests and adjusted for multiple comparisons using the Benjamini-Hochberg false discovery rate (FDR) correction. (DOCX)

## Author contributions

**Conceptualization:** Xiuchun Zhang.

**Data curation:** Jiabiao Hong, Guohua Wang.

**Investigation:** Jihong Chen.

**Methodology:** Kaiqiang Chen, Xiuchun Zhang, Penggang Bai.

**Software:** Kaiqiang Chen, Guohua Wang.

**Writing – original draft:** Jihong Chen.

**Writing – review & editing:** Penggang Bai.

## References

1. Duska LR, Podwika SE, Randall LM. Top advances of the year: Cervical cancer. *Cancer*. 2024;130(15):2571–6. <https://doi.org/10.1002/cncr.35334> PMID: [38651760](#)
2. Chargari C, Peignaux K, Escande A, Renard S, Lafond C, Petit A, et al. Radiotherapy of cervical cancer. *Cancer Radiother*. 2022;26(1–2):298–308. <https://doi.org/10.1016/j.canrad.2021.11.009> PMID: [34955418](#)
3. Sturdza AE, Knoth J. Image-guided brachytherapy in cervical cancer including fractionation. *Int J Gynecol Cancer*. 2022;32(3):273–80. <https://doi.org/10.1136/ijgc-2021-003056> PMID: [35256413](#)
4. Cibula D, Pötter R, Planchamp F, Avall-Lundqvist E, Fischerova D, Haie Meder C, et al. The European Society of Gynaecological Oncology/ European Society for Radiotherapy and Oncology/European Society of Pathology guidelines for the management of patients with cervical cancer. *Radiother Oncol*. 2018;127(3):404–16. <https://doi.org/10.1016/j.radonc.2018.03.003> PMID: [29728273](#)
5. Akbarov K, Guliyev E, Aliyeva N, Huseynov RRJB. Intracavitary versus Intracavitary/Interstitial HDR Brachytherapy for Cervical Cancer: Dose Difference to High Risk Clinical Target. 2017;16.
6. Jamadagni S, Ponni Tr A, P R. Dosimetric comparison of intra-cavitary brachytherapy technique with free-hand (intra-cavitary + interstitial) technique in cervical cancer. *J Contemp Brachytherapy*. 2024;16(1):28–34. <https://doi.org/10.5114/jcb.2024.135629> PMID: [38584889](#)
7. Yaegashi Y, Sasaki K. High-dose-rate brachytherapy using inverse planning optimization with tandem and ovoid applicators for locally advanced cervical cancer: a simulation study. *Radiol Phys Technol*. 2021;14(3):262–70. <https://doi.org/10.1007/s12194-021-00624-4> PMID: [34080129](#)
8. Yoshio K, Murakami N, Morota M, Harada K, Kitaguchi M, Yamagishi K, et al. Inverse planning for combination of intracavitary and interstitial brachytherapy for locally advanced cervical cancer. *J Radiat Res*. 2013;54(6):1146–52. <https://doi.org/10.1093/jrr/rrt072> PMID: [23728322](#)
9. Sachpazidis I, Hense J, Mavroidis P, Gainey M, Baltas D. Investigating the role of constrained CVT and CVT in HIPO inverse planning for HDR brachytherapy of prostate cancer. *Med Phys*. 2019;46(7):2955–68. <https://doi.org/10.1002/mp.13564> PMID: [31055834](#)
10. Matias LDS, Palmqvist T, Wolke J, Nilsson J, Beskow C, Maphossa AM, et al. Dosimetric and Radiobiological Evaluation of Hybrid Inverse Planning and Optimization for Cervical Cancer Brachytherapy. *Anticancer Res*. 2015;35(11):6091–6. PMID: [26504034](#)
11. Wakamiya T, Yamashita S, Kikkawa K, Kohjimoto Y, Noda Y, Sonomura T, et al. Inverse planning in high-dose rate brachytherapy improves quality of life of prostate cancer patients compared with forward planning. *Int J Clin Oncol*. 2021;26(4):728–35. <https://doi.org/10.1007/s10147-020-01851-2> PMID: [33486638](#)

12. Dinkla AM, van der Laarse R, Kaljouw E, Pieters BR, Koedooder K, van Wieringen N, et al. A comparison of inverse optimization algorithms for HDR/PDR prostate brachytherapy treatment planning. *Brachytherapy*. 2015;14(2):279–88. <https://doi.org/10.1016/j.brachy.2014.09.006> PMID: [25447341](#)
13. Akino Y, Shiomi H, Tsujimoto T, Hamatani N, Hirata T, Oda M, et al. Inverse planning optimization with lead block effectively suppresses dose to the mandible in high-dose-rate brachytherapy for tongue cancer. *Jpn J Radiol*. 2023;41(11):1290–7. <https://doi.org/10.1007/s11604-023-01451-w> PMID: [37273111](#)
14. Kannan RA, Gururajachar JM, Ponni A, Koushik K, Kumar M, Alva RC, et al. Comparison of manual and inverse optimisation techniques in high dose rate intracavitary brachytherapy of cervical cancer: A dosimetric study. *Rep Pract Oncol Radiother*. 2015;20(5):365–9. <https://doi.org/10.1016/j.rpor.2015.05.003> PMID: [26549994](#)
15. Wang X, Wang P, Tang B, Kang S, Hou Q, Wu Z, et al. An Inverse Dose Optimization Algorithm for Three-Dimensional Brachytherapy. *Front Oncol*. 2020;10:564580. <https://doi.org/10.3389/fonc.2020.564580> PMID: [33194640](#)
16. Dickhoff LRM, Kerkhof EM, Deuzeman HH, Barten DLJ, Velema LA, Stalpers LJA, et al. The versatility of evolutionary intelligent tri-objective treatment planning for cervical cancer brachytherapy. *Med Phys*. 2025;52(8):e18022. <https://doi.org/10.1002/mp.18022> PMID: [40790938](#)
17. Tomihara J, Takatsu J, Murakami N, Okonogi N, Inoue T, Iijima K, et al. Analysis of treatment planning time and optimization parameters for inverse planning for intracavitary and interstitial brachytherapy in uterine cervical cancer. *J Appl Clin Med Phys*. 2025;26(7):e70157. <https://doi.org/10.1002/acm2.70157> PMID: [40657692](#)
18. Dewitt KD, Hsu ICJ, Speight J, Weinberg VK, Lessard E, Pouliot J. 3D inverse treatment planning for the tandem and ovoid applicator in cervical cancer. *Int J Radiat Oncol Biol Phys*. 2005;63(4):1270–4. <https://doi.org/10.1016/j.ijrobp.2005.07.972> PMID: [16253782](#)
19. Tinkle CL, et al. Inverse planned high-dose-rate brachytherapy for locoregionally advanced cervical cancer: 4-year outcomes. *Int J Radiat Oncol Biol Phys*. 2015;92:1093–100.
20. Trnková P, Pötter R, Baltas D, Karabis A, Fidarova E, Dimopoulos J, et al. New inverse planning technology for image-guided cervical cancer brachytherapy: description and evaluation within a clinical frame. *Radiother Oncol*. 2009;93(2):331–40. <https://doi.org/10.1016/j.radonc.2009.10.004> PMID: [19846230](#)
21. Trnková P, Baltas D, Karabis A, Stock M, Dimopoulos J, Georg D, et al. A detailed dosimetric comparison between manual and inverse plans in HDR intracavitary/interstitial cervical cancer brachytherapy. *J Contemp Brachytherapy*. 2010;2(4):163–70. <https://doi.org/10.5114/jcb.2010.19497> PMID: [27853479](#)
22. Kumar Barik B, Sarang Dhar S, Singh R, Mandal A, Mohan Aggarwal L, Pratap Shahi U, et al. Dose optimization comparison study of inverse planning simulated annealing [IPSA] and hybrid inverse planning optimization [HIPO] in interstitial brachytherapy of head and neck cancer. *J Med Imaging Radiat Sci*. 2021;52(3):417–21. <https://doi.org/10.1016/j.jmir.2021.05.004> PMID: [34088645](#)
23. Choi CH, Park S-Y, Park JM, Wu H-G, Kim J-H, Kim J-I. Comparison of the IPSA and HIPO algorithms for interstitial tongue high-dose-rate brachytherapy. *PLoS One*. 2018;13(10):e0205229. <https://doi.org/10.1371/journal.pone.0205229> PMID: [30286187](#)
24. Priean VG, Aggarwal LM, Mourya A, Choudhary S, Shajid SM, Mandal A, et al. A dosimetric study to evaluate the inverse planning simulated annealing (IPSA) and hybrid inverse planning optimization (HIPO) algorithms in HDR brachytherapy of cervical cancer. *J Cancer Res Ther*. 2025;21(3):576–82. [https://doi.org/10.4103/jcrt.jcrt\\_1335\\_24](https://doi.org/10.4103/jcrt.jcrt_1335_24) PMID: [40616539](#)
25. Oku Y, Itou S, Wakamatsu S, Niiyama Y, Toyota M. Investigation of Dosimetric Evaluation and Treatment Planning Time of Inverse Planning Optimization in Combined Intracavitary and Interstitial Brachytherapy for Cervical Cancer. *Cureus*. 2025;17(5):e83330. <https://doi.org/10.7759/cureus.83330> PMID: [40452691](#)
26. Cunha A, Siauw T, Hsu I-C, Pouliot J. A method for restricting intracatheter dwell time variance in high-dose-rate brachytherapy plan optimization. *Brachytherapy*. 2016;15(2):246–51. <https://doi.org/10.1016/j.brachy.2015.10.009> PMID: [26727333](#)
27. Mavroidis P, Katsilieri Z, Kefala V, Milickovic N, Papanikolaou N, Karabis A, et al. Radiobiological evaluation of the influence of dwell time modulation restriction in HIPO optimized HDR prostate brachytherapy implants. *J Contemp Brachytherapy*. 2010;2(3):117–28. <https://doi.org/10.5114/jcb.2010.16923> PMID: [27853473](#)
28. Tang B, Liu X, Wang X, Kang S, Wang P, Li J, et al. Dosimetric comparison of graphical optimization and inverse planning simulated annealing for brachytherapy of cervical cancer. *J Contemp Brachytherapy*. 2019;11(4):379–83. <https://doi.org/10.5114/jcb.2019.87145> PMID: [31523240](#)
29. Srivastava S, Singh N, Kashyap VK. Dosimetric Evaluation of Different Optimization Algorithms Used in Interstitial Brachytherapy of Cervical Carcinoma. *J Biomed Phys Eng*. 2022;12(4):339–48. <https://doi.org/10.31661/jbpe.v0i0.2104-1306> PMID: [36059288](#)
30. Kaur G, Garg P, Srivastava AK, Gaur G, Sheetal, Grover R, et al. Dosimetric and radiobiological evaluation of treatment plan for cervical cancer high-dose-rate intracavitary brachytherapy. *J Contemp Brachytherapy*. 2022;14(3):253–9. <https://doi.org/10.5114/jcb.2022.117729> PMID: [36199997](#)
31. Yan C, Wang X, Wen A, Luo J, Zhang S, Wang P, et al. Comparative analysis of dosimetric and radiobiological models of IPSA and HIPO algorithms in combined intra-cavitary/interstitial brachytherapy for cervical cancer. *J Contemp Brachytherapy*. 2023;15(3):212–9. <https://doi.org/10.5114/jcb.2023.128894> PMID: [37425198](#)
32. Mazon R, Fokdal LU, Kirchheiner K, Georg P, Jastaniyah N, Šegedin B, et al. Dose-volume effect relationships for late rectal morbidity in patients treated with chemoradiation and MRI-guided adaptive brachytherapy for locally advanced cervical cancer: Results from the prospective multicenter EMBRACE study. *Radiother Oncol*. 2016;120(3):412–9. <https://doi.org/10.1016/j.radonc.2016.06.006> PMID: [27396811](#)

33. Fu Q, Xu Y, Zuo J, An J, Huang M, Yang X, et al. Comparison of two inverse planning algorithms for cervical cancer brachytherapy. *J Appl Clin Med Phys.* 2021;22(3):157–65. <https://doi.org/10.1002/acm2.13195> PMID: [33626225](https://pubmed.ncbi.nlm.nih.gov/33626225/)
34. Muangwong P, Tharavichitkul E, Sripan P, Chakrabandhu S, Klunklin P, Onchan W, et al. Brachytherapy dose changes: comparing in-room and out-room image-guided brachytherapy. A randomized study. *J Contemp Brachytherapy.* 2022;14(4):347–53. <https://doi.org/10.5114/jcb.2022.118940> PMID: [36199946](https://pubmed.ncbi.nlm.nih.gov/36199946/)
35. Yan G, Kang S, Tang B, Li J, Wang P, Wang X, et al. Effect of the dwell time deviation constraint on brachytherapy treatment planning for cervical cancer. *J Int Med Res.* 2021;49(8):3000605211037477. <https://doi.org/10.1177/03000605211037477> PMID: [34423665](https://pubmed.ncbi.nlm.nih.gov/34423665/)
